# Supplementary material for: Novel Approach for Evaluating Pregnancy-Associated Glycoprotein and Inflammation Markers during the Postpartum Period in Holstein Friesian Cows
Source: MDPI journal article supplement (doi:10.3390/ani14101459), 2024-05-14
Supplement: s1 [file s1]

**Table S1.** Characteristics of the cows included in this study.

| Parameters                                           | No.              |
|------------------------------------------------------|------------------|
| Cows examined                                        | 19               |
| Analyzed cows                                        | 19               |
| Postpartum status                                    |                  |
| Pregnant                                             | 13 (68.4%)       |
| First AI pregnancy rate                              | 21.0%            |
| Culled                                               | 2                |
| Non-pregnant                                         | 4                |
| Days open period                                     |                  |
| Mean $\pm$ SD                                        | 121.5 $\pm$ 53.0 |
| Median (range)                                       | 105 (68, 246)    |
| No. of cows with cysts                               | 12 (63.1%)       |
| No. of cows with mastitis                            | 11 (57.8%)       |
| No. of cows with ketosis                             | 8 (42.1%)        |
| No. of cows with endometritis, metritis, or pyometra | 4 (21.0%)        |

SD, standard deviation; AI, artificial insemination.

**Table S2.** Association between mastitis, PAG slope, postpartum days open period, and inflammation markers.

|                                                     | Mastitis           |                    | <i>p</i> -Value  |
|-----------------------------------------------------|--------------------|--------------------|------------------|
|                                                     | Without            | With               | Without vs. with |
| No. of cows                                         | 8                  | 11                 |                  |
| Days open period (mean $\pm$ SD)                    | 119.5 $\pm$ 36.9   | 133.1 $\pm$ 67.8   | 0.640            |
| PAG slope                                           | -0.066 $\pm$ 0.018 | -0.047 $\pm$ 0.028 | 0.095            |
| Estimate day 1 SAA                                  | 2.44 $\pm$ 1.01    | 2.59 $\pm$ 1.08    | 0.762            |
| SAA slope                                           | -0.039 $\pm$ 0.005 | -0.041 $\pm$ 0.006 | 0.706            |
| No. of cows with MAA<br>more than 12 $\mu$ g/mL (%) | 3 (37.5)           | 9 (81.8)           | 0.074            |

SD, standard deviation; PAG, pregnancy-associated glycoprotein; SAA, serum amyloid A; MAA, milk amyloid A.

**Table S3.** Association between ketosis, PAG slope, postpartum days open period, and inflammation markers.

|                                                     | Ketosis            |                    | <i>p</i> -Value  |
|-----------------------------------------------------|--------------------|--------------------|------------------|
|                                                     | Without            | With               | With vs. without |
| No. of cows                                         | 11                 | 8                  |                  |
| Days open period (mean $\pm$ SD)                    | 116.0 $\pm$ 44.4   | 134.0 $\pm$ 75.3   | 0.679            |
| PAG slope                                           | -0.059 $\pm$ 0.029 | -0.056 $\pm$ 0.010 | 0.810            |
| Estimate day 1 SAA                                  | 2.62 $\pm$ 1.16    | 2.29 $\pm$ 0.95    | 0.514            |
| SAA slope                                           | -0.040 $\pm$ 0.006 | -0.038 $\pm$ 0.008 | 0.653            |
| No. of cows with MAA<br>more than 12 $\mu$ g/mL (%) | 7 (63.6)           | 5 (62.5)           | 0.999            |

SD, standard deviation; PAG, pregnancy-associated glycoprotein; SAA, serum amyloid A; MAA, milk amyloid A.
